# Supplementary material for: Encouraging participant embodiment during VR-assisted public speaking training improves persuasiveness and charisma and reduces anxiety in secondary school students
Source: Frontiers journal article supplement (doi:10.3389/frvir.2023.1074062), 2023-10-03
Supplement: Data_Sheet_1.docx [file Data_Sheet_1.docx]

**PUBLIC SPEAKING TASKS**

| **Instructions for the PRE- and POST-training public speaking tasks**  **ENGLISH VERSION**  PREPARATION TIME: **2 MINUTES**  SPEECH DURATION: **2 MINUTES**  **Situation**: Three representatives of the Department of Education have come to your school to listen to the proposals of a group of students. They’re thinking of allocating a larger share of government spending to school trips to the countryside.  Your claim is that adolescents need to **spend more time in nature** and not so many hours inside the city.  In order to argue in favor of your proposal, you have prepared a list of studies with data that will allow you to **convince the representatives** to assign more financing for this purpose.   - More than 50% of the population currently lives in urban areas. It is estimated that in 2050 the percentage will rise to 70% (Bratman, G; 2015). - People surrounded by fewer trees experience more stress and higher mortality rates. - Being surrounded by nature reduces levels of stress hormone, blood pressure and blood sugar. - Being surrounded by nature increases cardiovascular and metabolic health, concentration, and memory. - Strolling in the forest increases creativity, vitality, and relaxation (Finnish Forest Research Institute).   GOOD LUCK! |
| --- |

| **Instructions for the TRAINING 1 public speaking task**  **ENGLISH VERSION**  **THE HOUSE OF MY DREAMS**  PREPARATION TIME: **2 MINUTES**  SPEECH DURATION: **2 MINUTES**  Questions that can help you prepare the structure and content of your speech:   - Description of the house - Where would it be located? - Why would it have those particular features? - What would be essential to furnish of the house? - What would you do in such a house? - Would you live alone or would you like to share it with other people?   GOOD LUCK! |
| --- |

| **Instructions for the TRAINING 2 public speaking task**  **ENGLISH VERSION**  IS GRAFFITI ART?  PREPARATION TIME: **2 MINUTES**  SPEECH DURATION: **2 MINUTES**  Questions that can help you prepare the structure and content of your speech:   - Description of what constitutes graffiti? - Where do we usually find it? - Who produces it? - Why is it important/necessary or unimportant/unnecessary? - Would you consider it an art form? If so, why? If not, why not? - Describe some examples you have seen or produced yourself. Use examples and personal experience   GOOD LUCK! |
| --- |

| **Instructions for the TRAINING 3 public speaking task**  **ENGLISH VERSION**  MONEY CAN’T BUY HAPPINESS  PREPARATION TIME: **2 MINUTES**  SPEECH DURATION: **2 MINUTES**  Questions that can help you prepare the structure and content of the message:   - How would you describe happiness? - What can and can’t money buy? - What in your view are the defining features of wealth and poverty? - Justify your agreement or disagreement with the title ‘Money can’t buy happiness’. - Describe examples or experience that illustrate your idea of happiness.   GOOD LUCK! |
| --- |
